# Supplementary material for: Comparative genomics reveals broad genetic diversity, extensive recombination and nascent ecological adaptation in Micrococcus luteus
Source: PubMed Central journal article supplement (PMC7890812; doi:10.1186/s12864-021-07432-5), 2021-02-18
Supplement: 12864_2021_7432_MOESM2_ESM.pdf [file 12864_2021_7432_MOESM2_ESM.pdf]

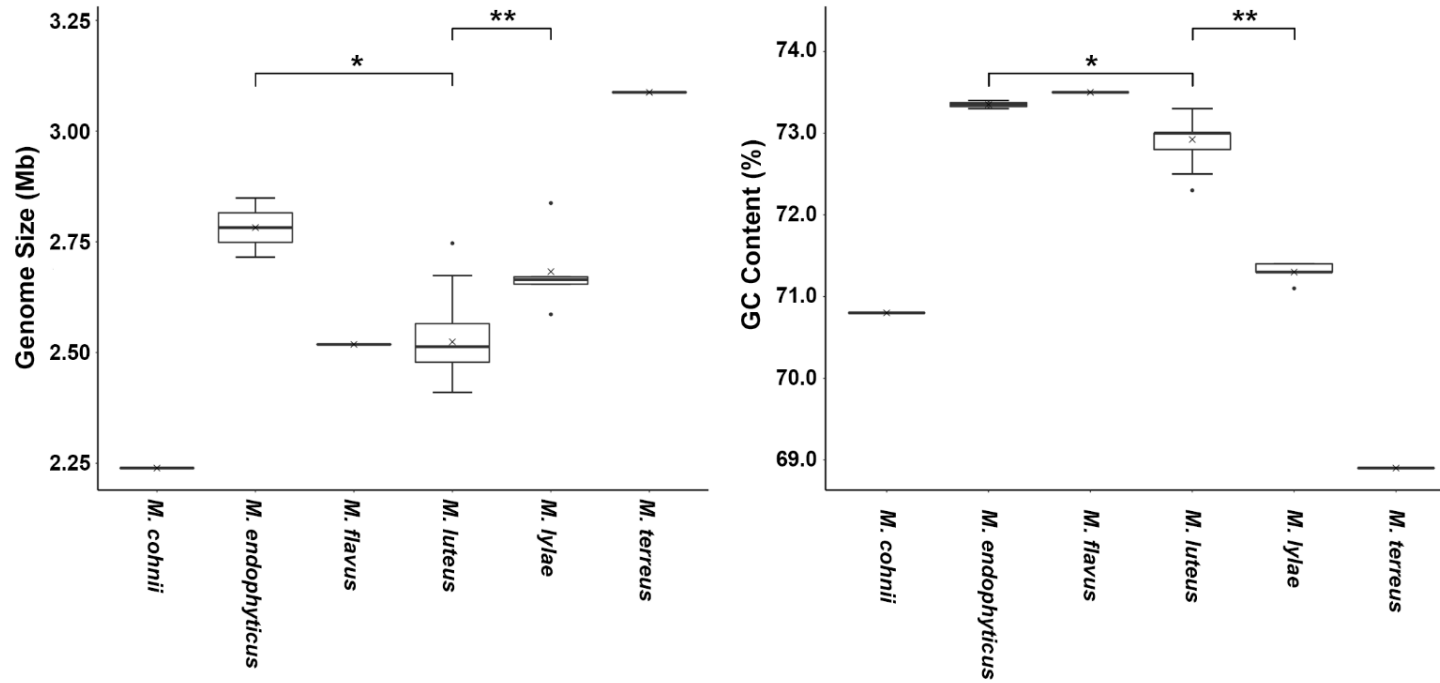

**Figure S1. Variations in genome size and GC content between species in genus *Micrococcus*.** Significant levels in variations were determined using Wilcoxon test (\*,  $P < 0.05$ ; \*\*,  $P < 0.01$ ).

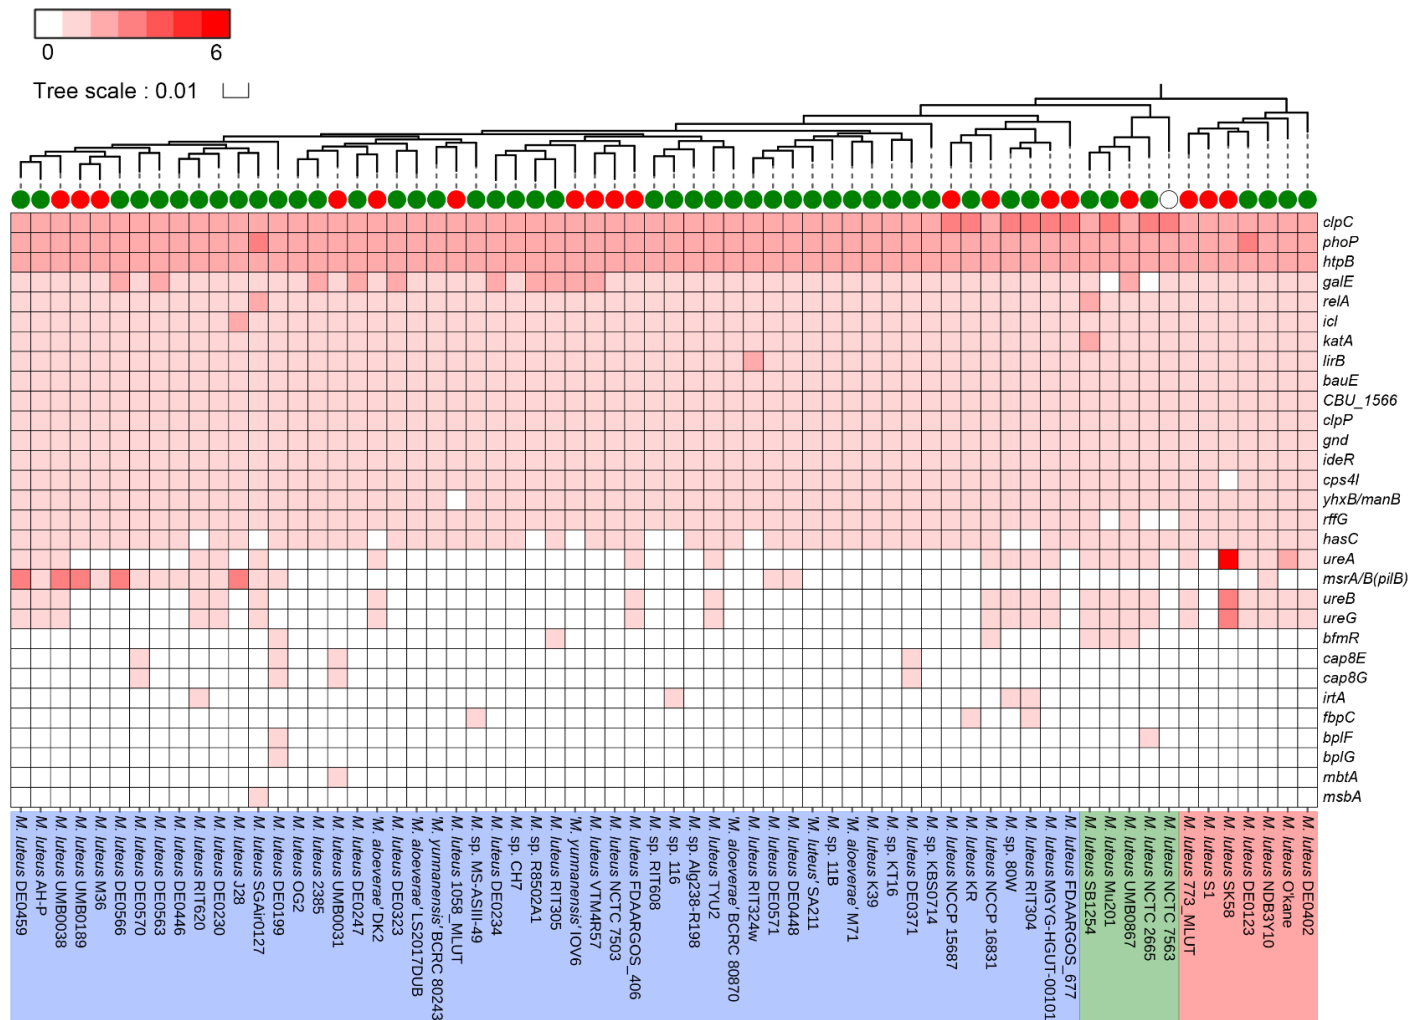

**Figure S2.** Heatmap of the distributions of the putative VF genes in *M. luteus* genomes. The color bar shows the number of genes. The tree topology is derived from FIG 3. Three major clades are presented by different background colors. The scale bar indicates 1% sequence divergence. Different habitats are represented by circles in different colors (red, HA; green, NHA; blank, uncertain).

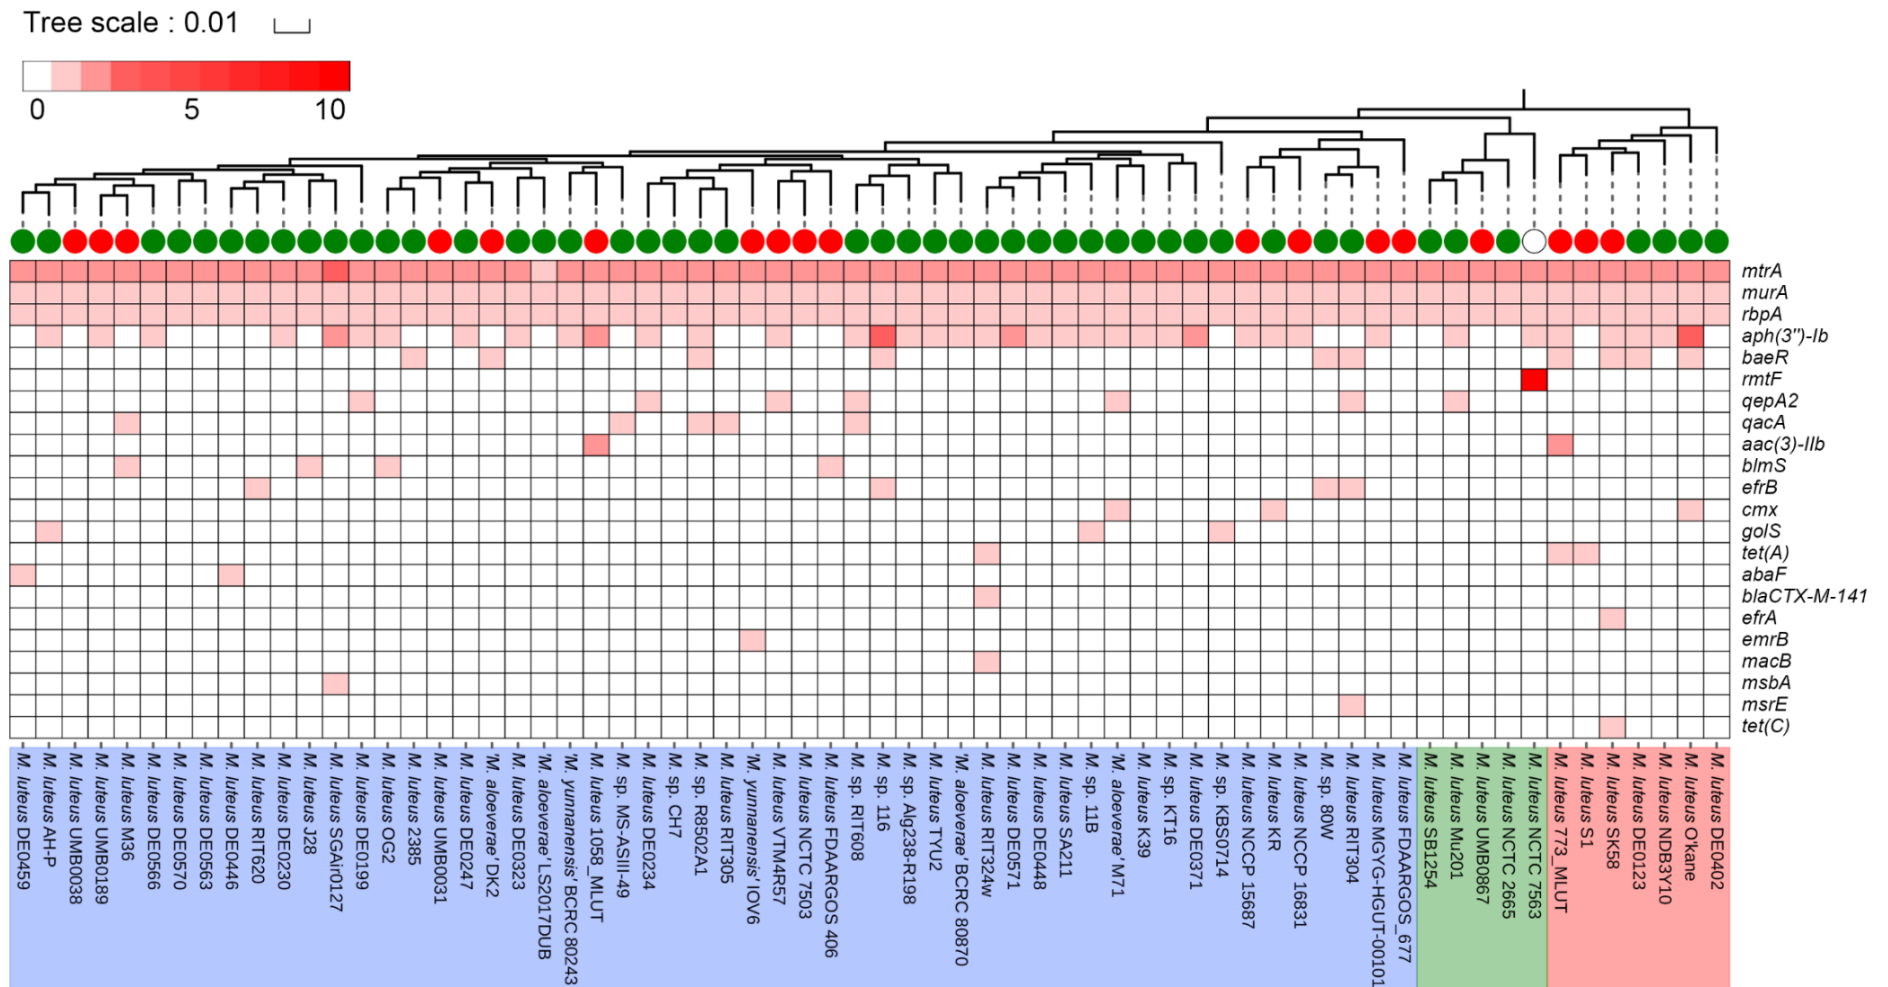

**Figure S3. Antibiotic resistance gene profiles of *M. luteus* strains.** The color bar shows the number of genes. The tree topology is derived from FIG 3. Three major clades are presented by different background colors. The scale bar indicates 1% sequence divergence. Different habitats are represented by circles in different colors (red, HA; green, NHA; blank, uncertain).

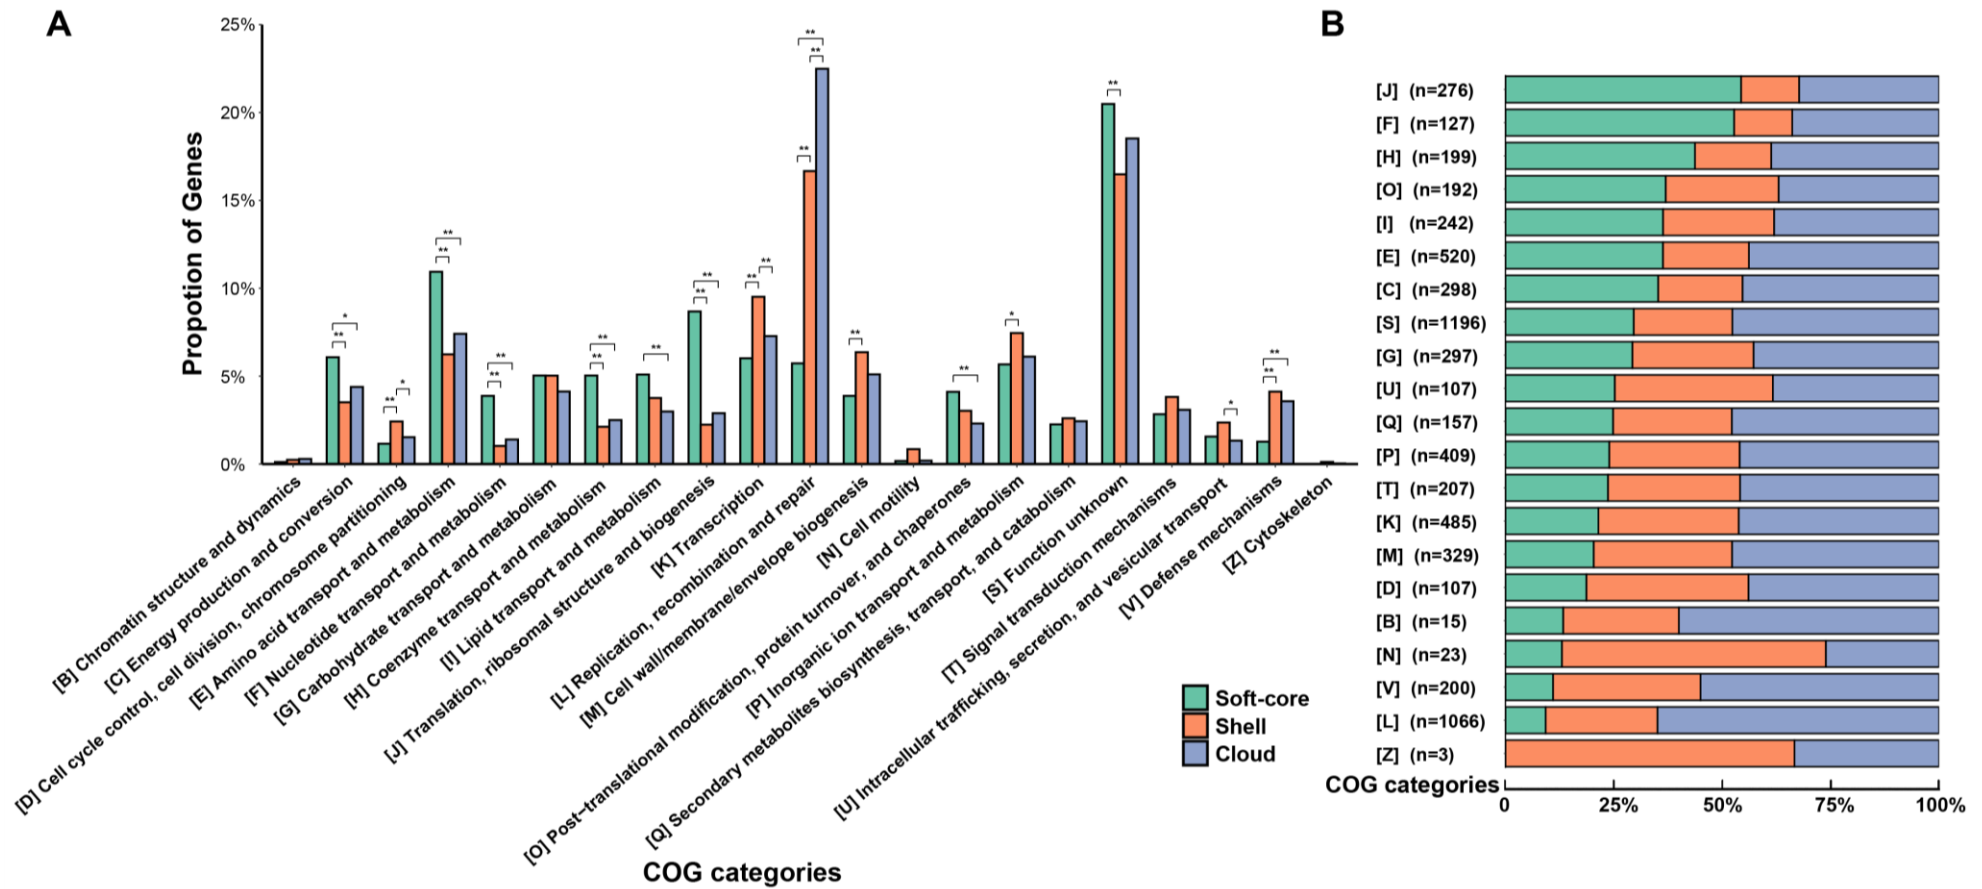

**Figure S4. Comparison of the soft-core, shell and cloud genomes of *M. luteus* based on COG categories.** Soft-core, shell and cloud genes were derived from GET\_HOMOLOGUES. (A) Distribution of OGs in the soft-core, shell and cloud genomes. Asterisks indicate significant differences in proportions based on Fisher's exact test (\*,  $P < 0.05$ ; \*\*,  $P < 0.01$ ). (B) Partitioning of soft-core, shell and cloud genes for each COG category.

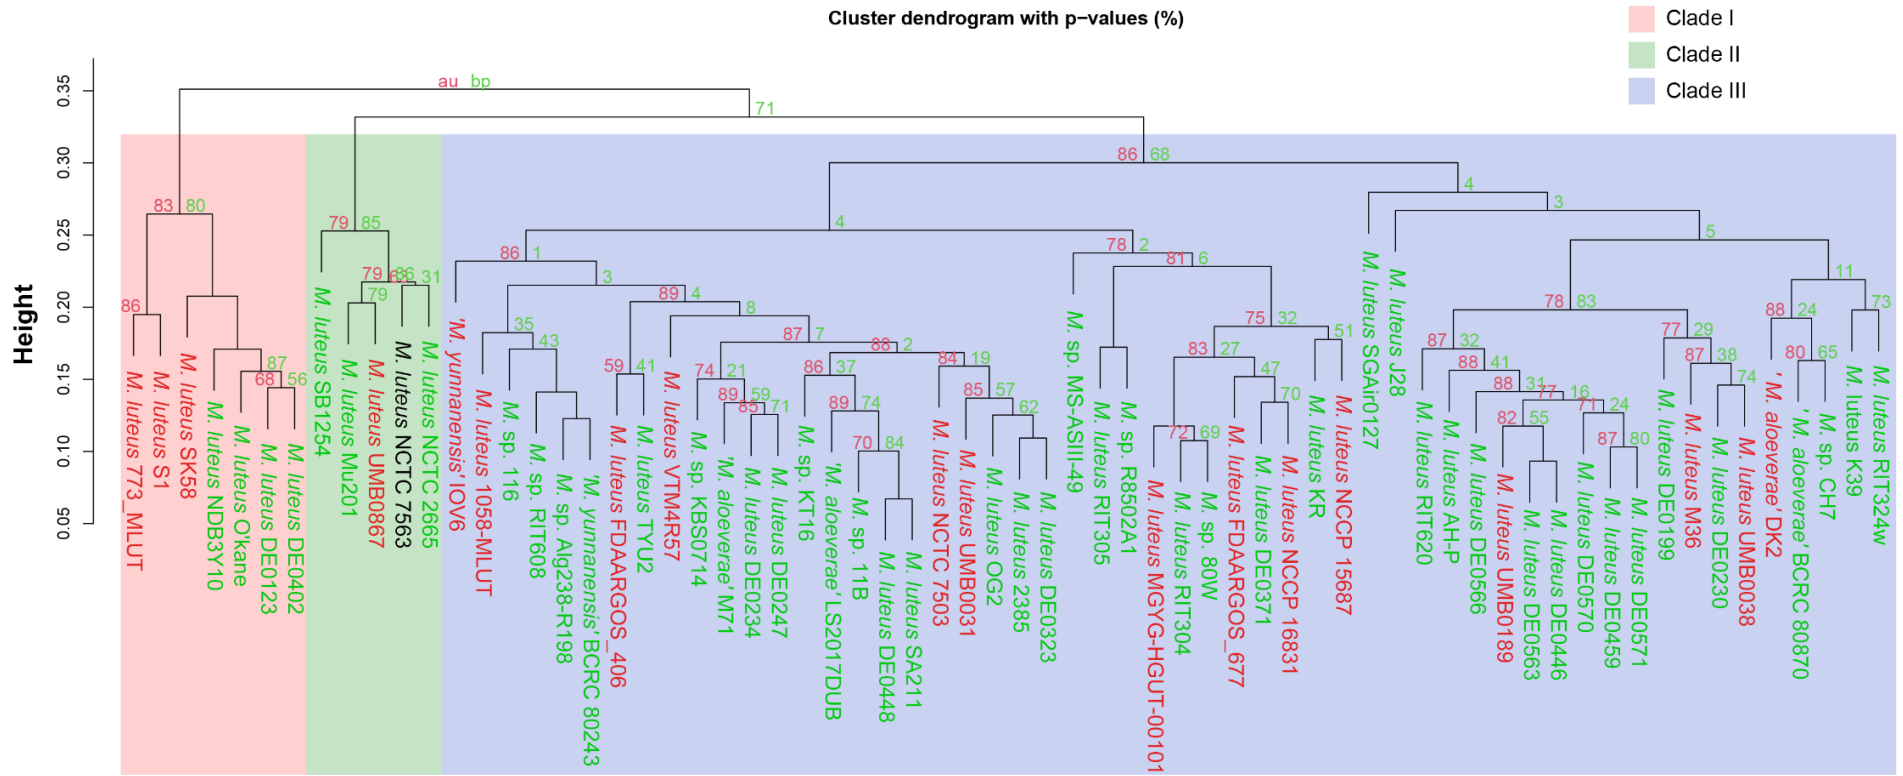

**Figure S5. Hierarchical cluster analysis based on the presence or absence of dispensable genes.** Two bootstrap resampling methods from 1,000 replicates were employed to assess the uncertainty in the hierarchical cluster analysis: approximately unbiased (au) in red and bootstrap probability (bp) in green. Only values lower than 90% are shown. Height indicates the dissimilarity between genomes. Three major clades are presented by different background colors. Strains collected from different habitats are represented in different colors (red, HA; green, NHA; black, uncertain).

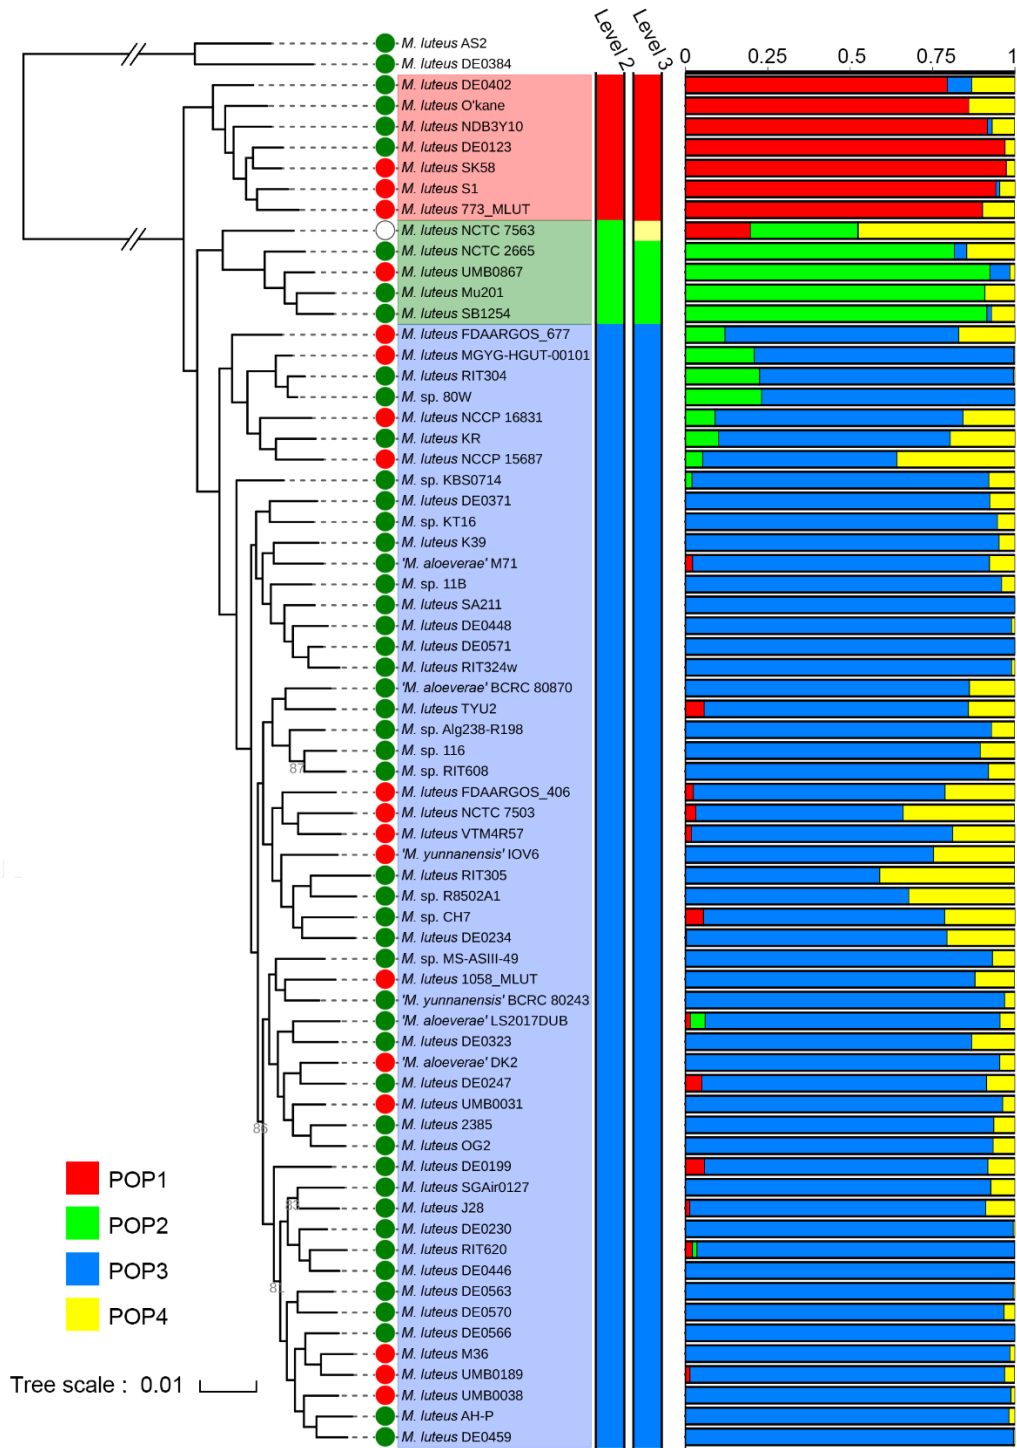

**Figure S6. Population structure of *M. luteus*.** Two levels of Fastbaps clusters and Structure plot of the 66 *M. luteus* strains are shown. Stacked bar chart shows the contribution to each *M. luteus* strain from each of the four hypothetical ancestral populations. The tree topology is derived from FIG 3. Three major clades are presented by different background colors. The scale bar indicates 1% sequence divergence. Strains from different habitats are represented by circles in different colors (red, HA; green, NHA; blank, uncertain).

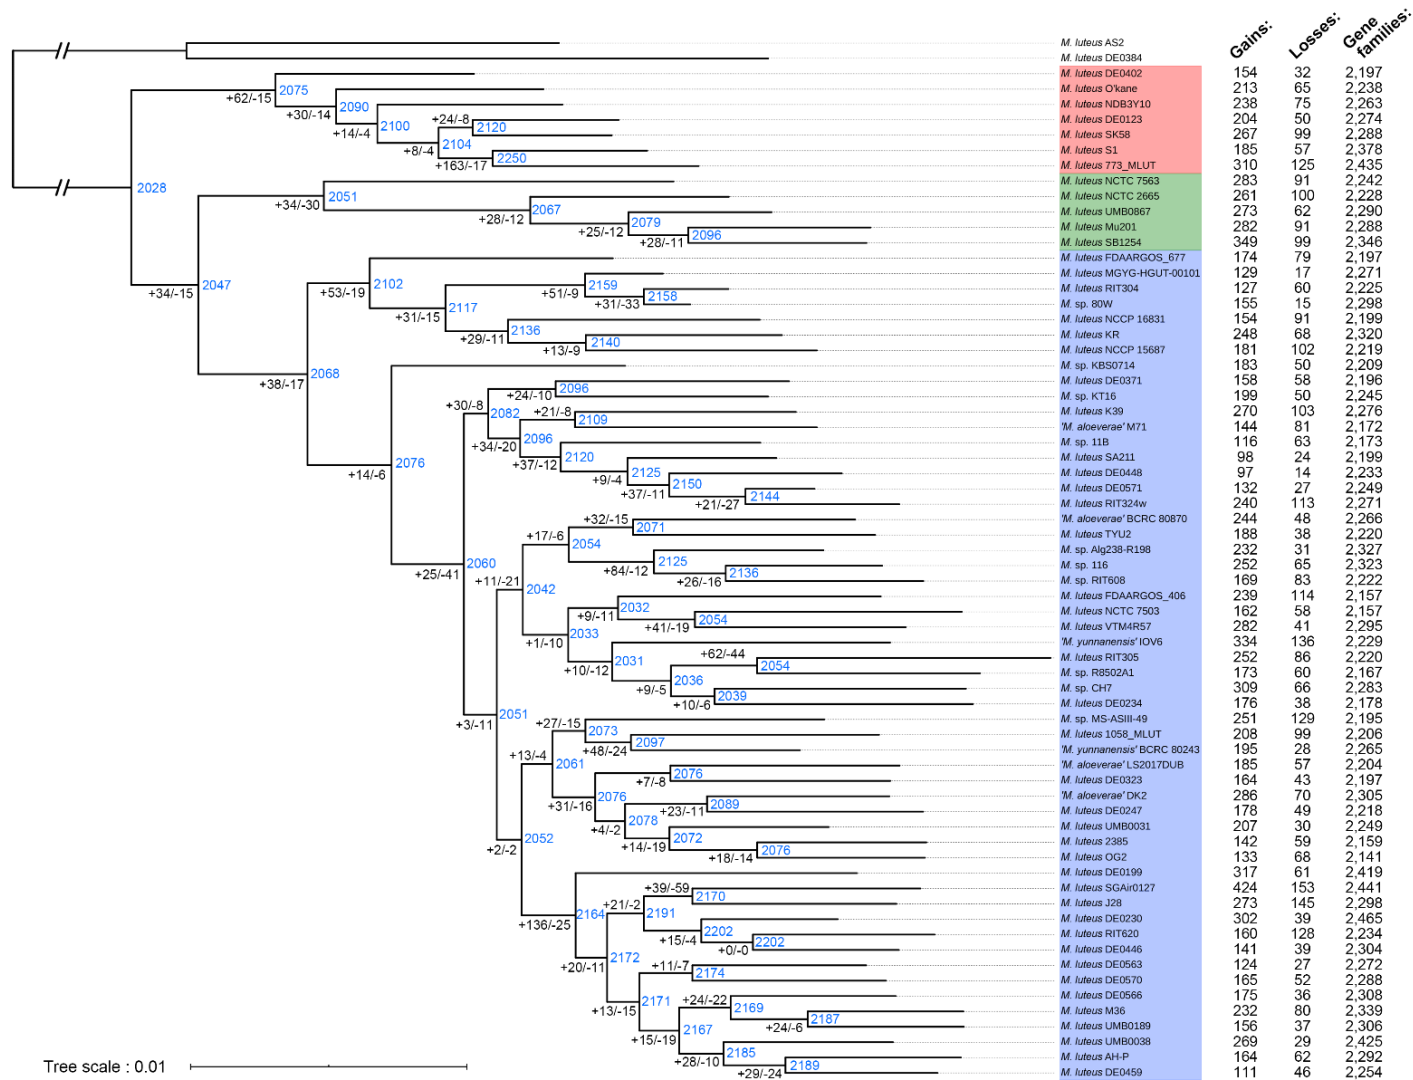

**Figure S7. Ancestral genome content reconstruction using COUNT software.** The tree topology is derived from FIG 3. The numbers of gain and loss events are shown at each lineage of the tree. “+”s represent gain events and “-”s represent loss events. The numbers in blue represent the total numbers of genes at nodes. Three major clades are presented by different background colors. The scale bar indicates 1% sequence divergence.
